# Supplementary material for: Arbuscular mycorrhizal fungi influence the speciation and subcellular abundance of uranium in plant roots
Source: Royal Society of Chemistry journal article supplement (doi:10.1039/d5em00108k), 2025-01-01
Supplement: d5em00108k1.pdf [file d5em00108k1.pdf]

## Electronic Supplementary Information

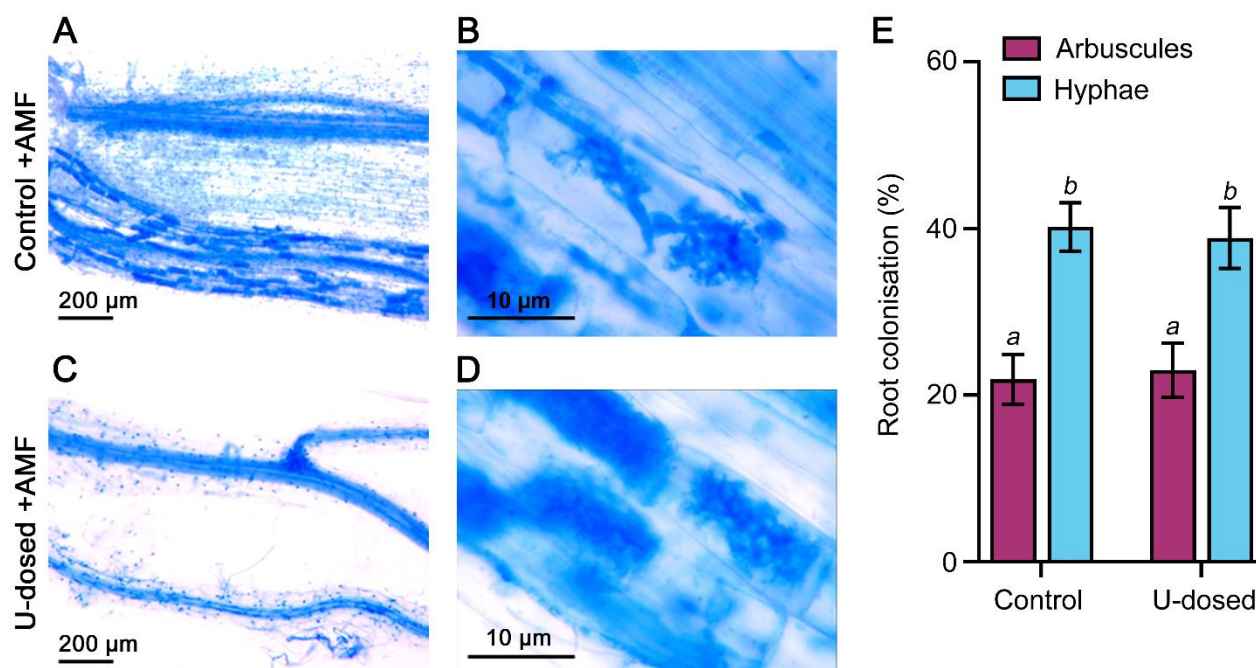

**Fig. S1.** AM fungal colonisation of *Plantago lanceolata* roots in response to U dosing. (A – D) Representative images at low and high magnification of aniline-blue stained root segments from control (un-dosed) (A and B) and U-dosed (C and D) seedlings colonised by *Rhizophagus irregularis*. The magnified images (B and D) show *R. irregularis* arbuscules connected to filamentous hyphal structures. (E) Arbuscular and hyphal colonisation within control (un-dosed) and U-dosed seedlings. Data are mean values  $\pm$  SEM,  $n = 5$ . Different lowercase letters indicate statistically significant difference ( $p < 0.05$ ) between treatments as determined by 2-way ANOVA and Tukey's post-hoc test. Un-colonised seedlings showed no arbuscular or hyphal presence and so values are not shown.



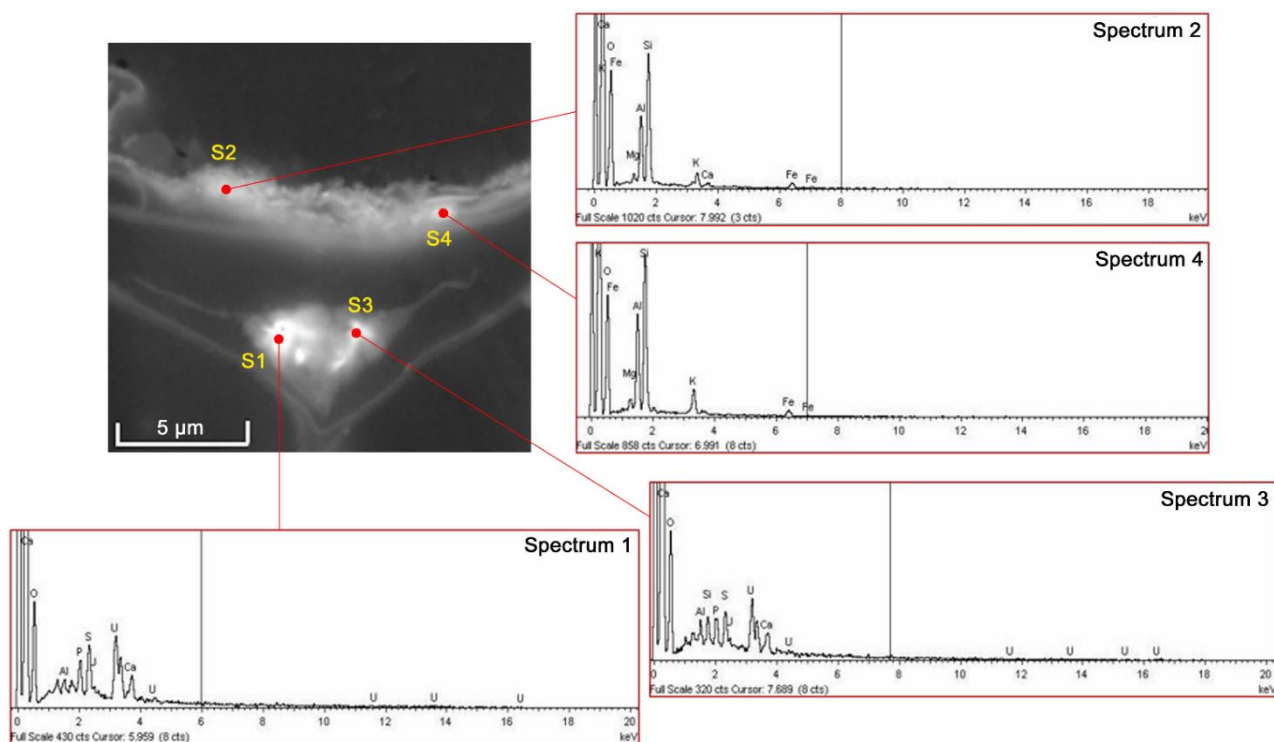

**Fig. S2.** BSE image of a representative epidermal cell region from a U-dosed non-mycorrhizal root containing U-rich particles. EDS point spectra obtained from four selected regions (S1 – S4) are shown. Spectra 1 and 3 provide evidence of U, P and Ca rich particles while spectra 2 and 4 provide evidence of Fe and Al rich particles. Elemental maps of the same cell region is presented in Fig. 3A.



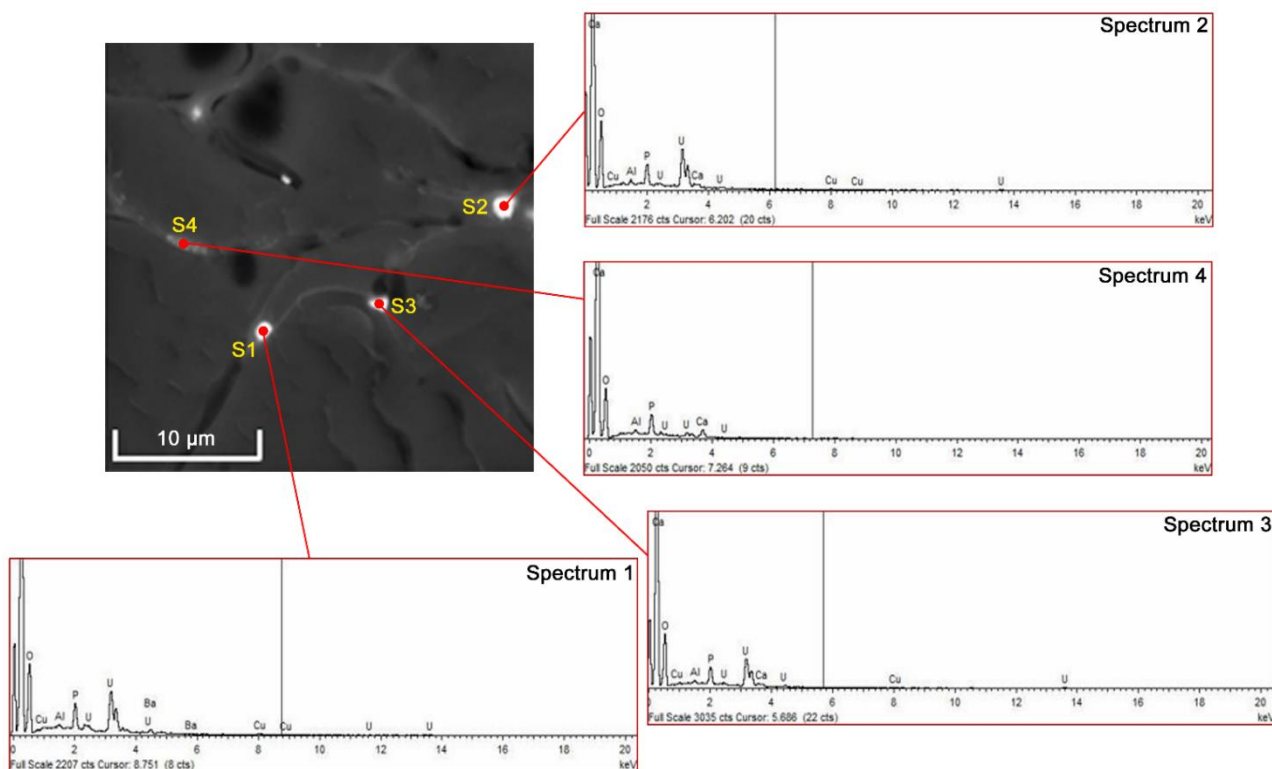

**Fig. S3.** BSE image of a representative epidermal cell region from a U-dosed mycorrhizal root containing U-rich particles. EDS point spectra obtained from four selected regions (S1 – S4) are shown. All spectra provide evidence of U, P and Ca rich particles. Elemental maps of the same cell region is presented in Fig. 3A.



U-dosed +AMF

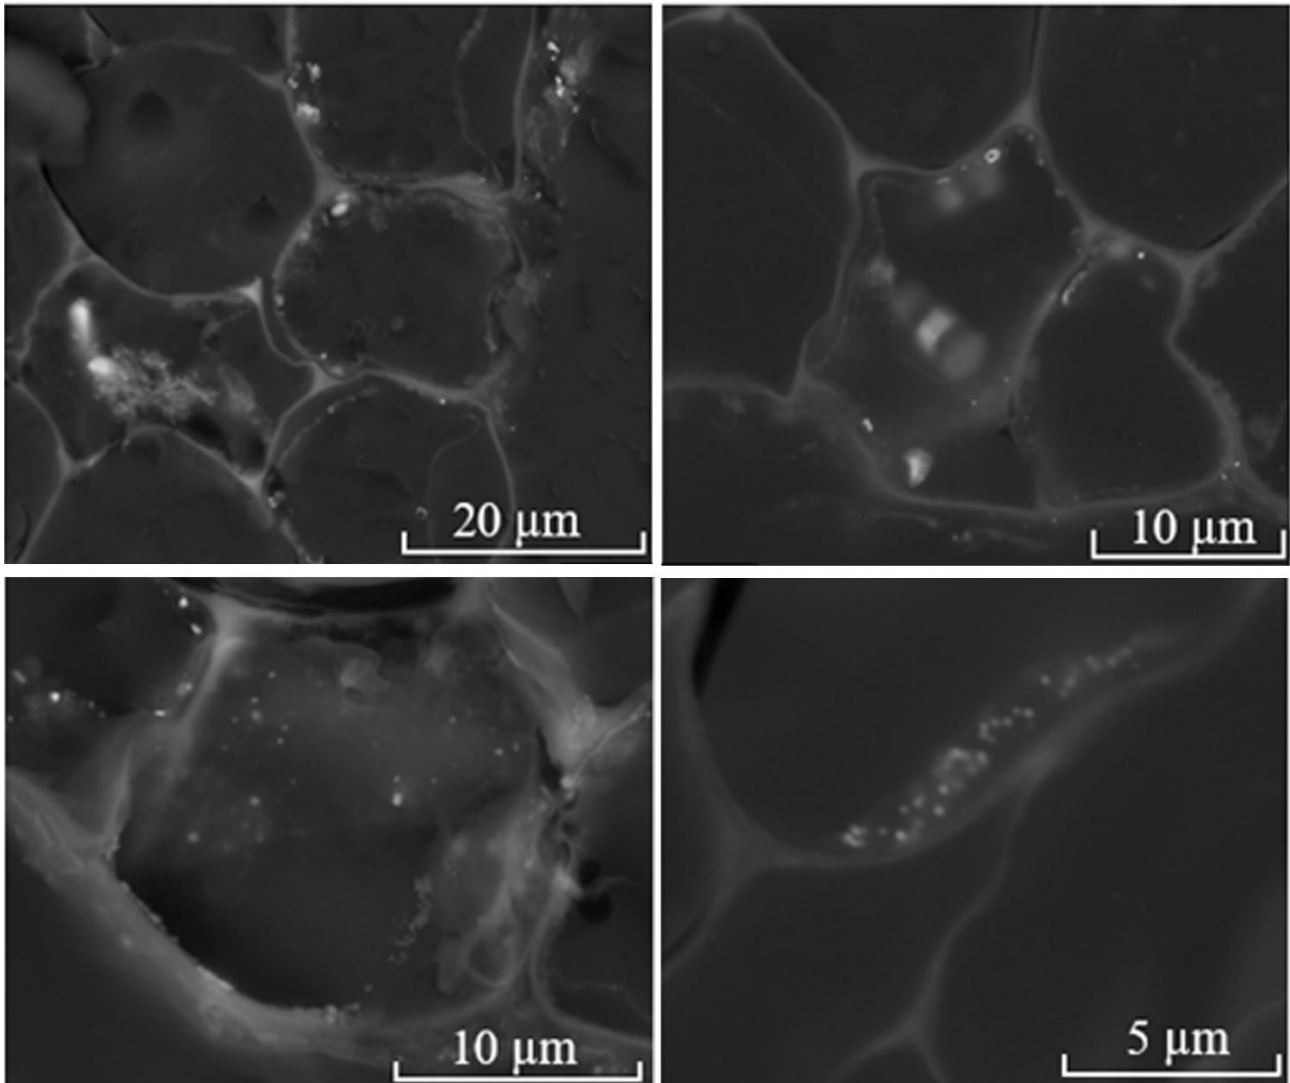

**Fig. S4.** BSE images for four representative root sections from U-dosed mycorrhizal (+AMF) seedlings. The presence of U-rich particles were detected within and surrounding cortex cells as bright structures.



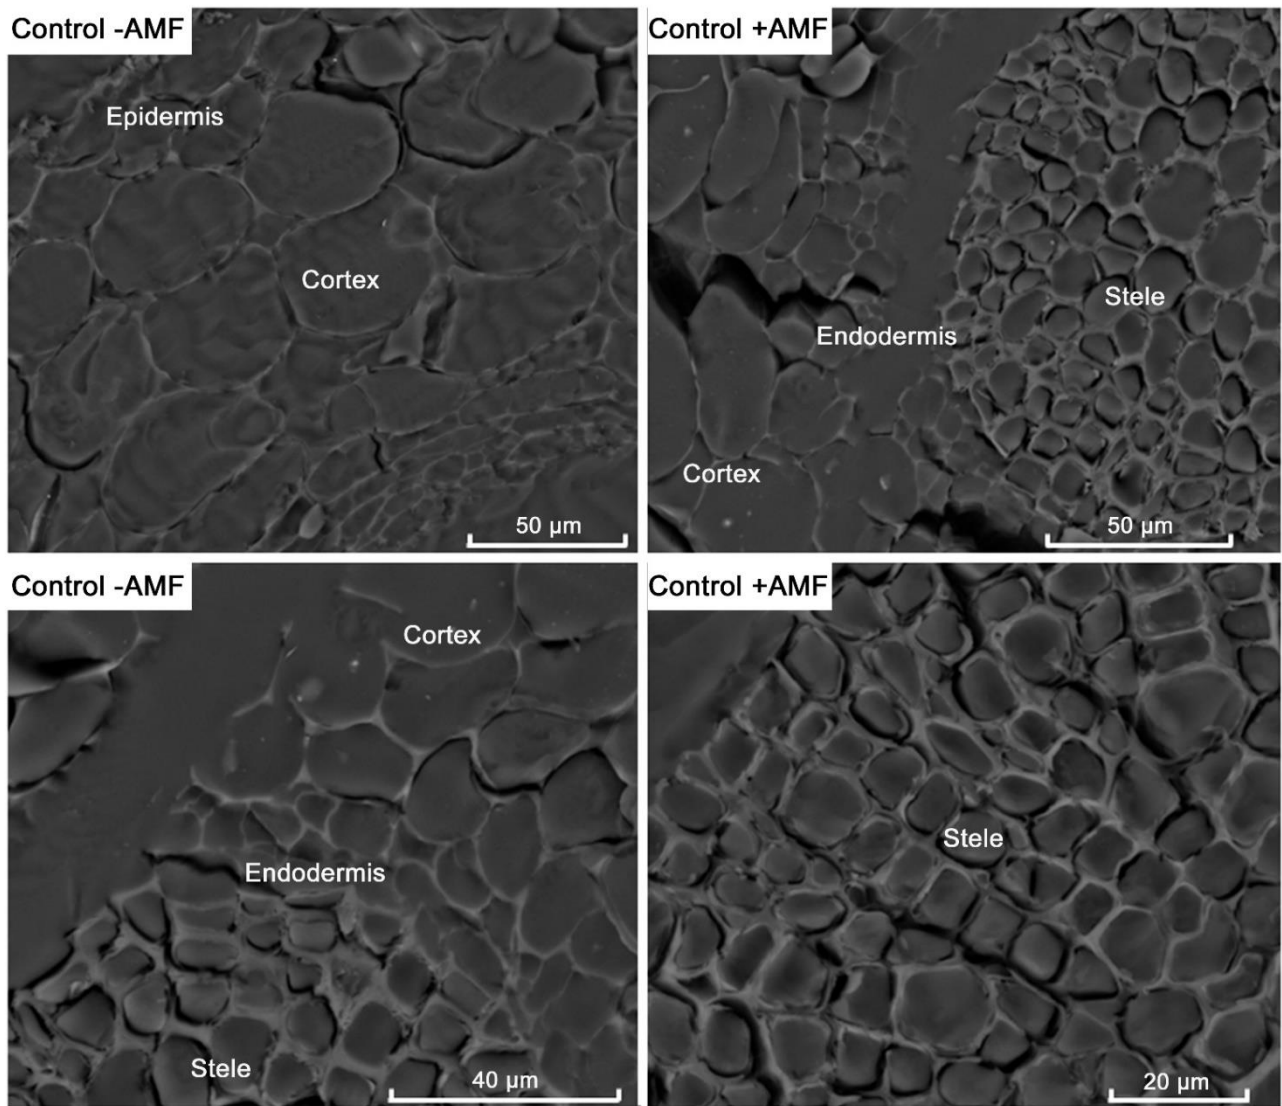

**Fig. S5.** BSE images for representative root sections from un-dosed (control) non-mycorrhizal (-AMF) and mycorrhizal (+AMF) seedlings. U-rich regions were undetectable in both the -AMF and +AMF un-dosed roots.



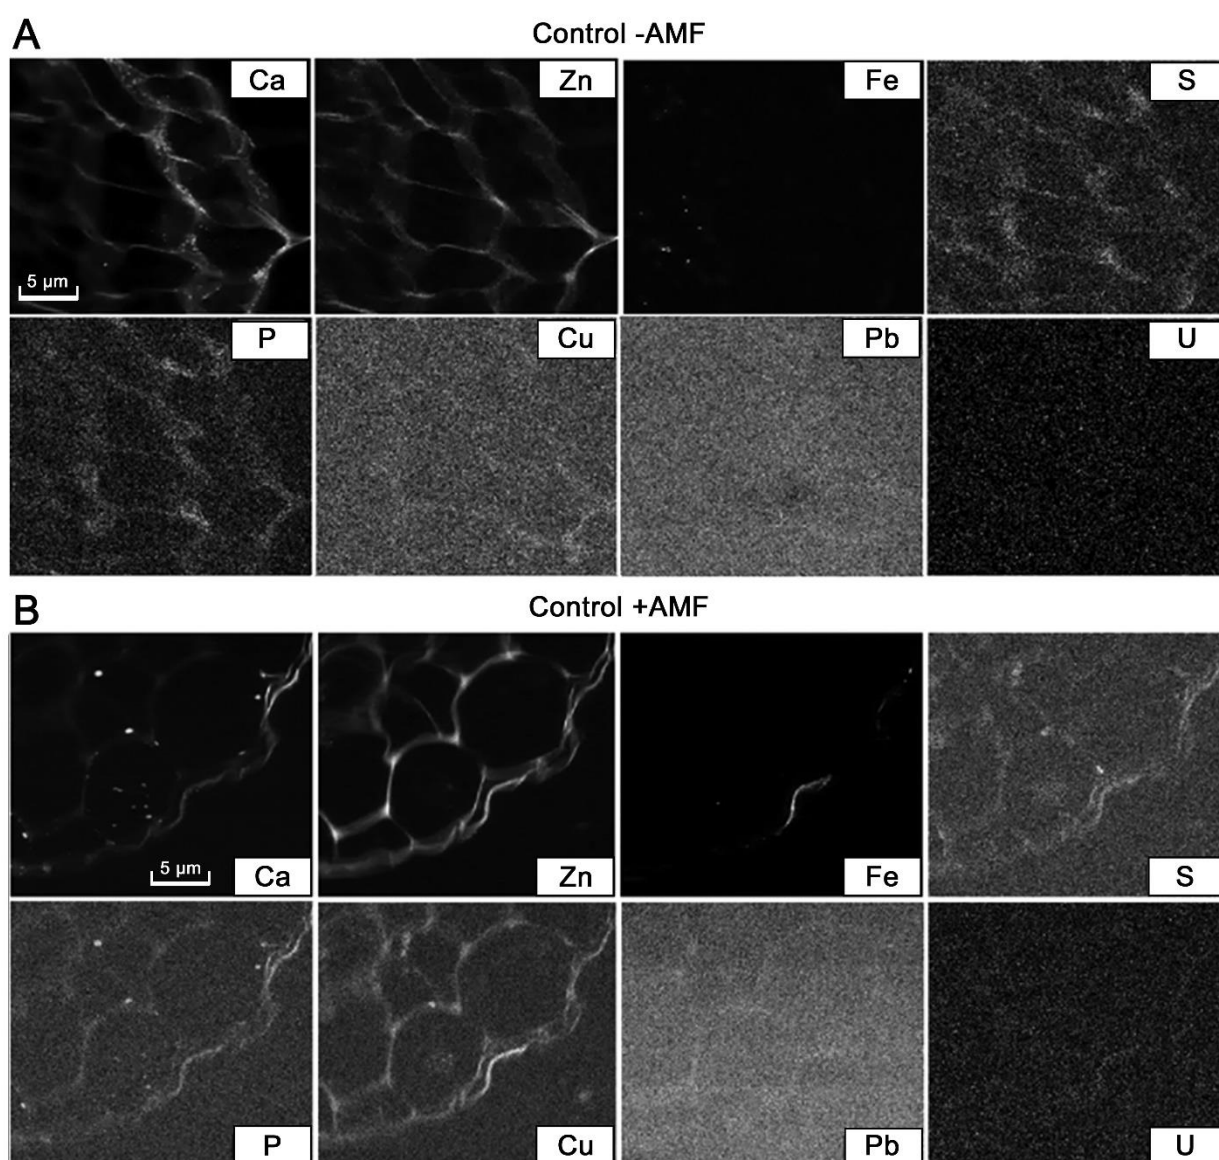

**Fig. S6.** SR  $\mu$ -XRF imaging of un-dosed (control) roots. Element maps show Ca, Zn, Fe, S, P, Cu, Pb and U distribution in selected epidermal cells from representative transverse root sections of control non-mycorrhizal (-AMF) seedlings (A) and mycorrhizal (+AMF) seedlings (B). Brighter regions represent a greater concentration of the target element. Scanned regions were 25  $\mu$ m x 25  $\mu$ m at 100 nm per pixel resolution.



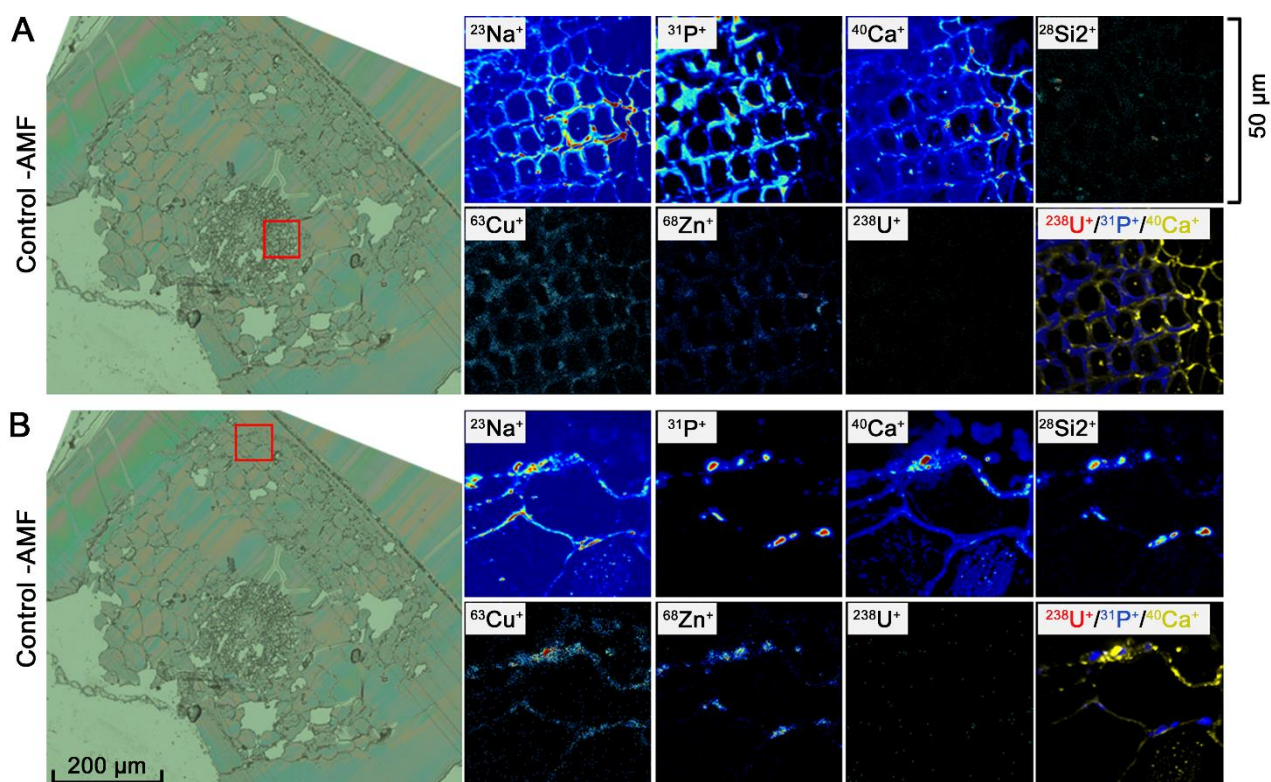

**Fig. S7.** NanoSIMS imaging of un-dosed (control) non-mycorrhizal roots. Optical photomicrographs of the root section (left) with NanoSIMS chemical maps (thermal colour scale) depicting elemental distributions of Na, P, Ca, Si<sub>2</sub>, Cu, Zn and U within the stele of representative control non-mycorrhizal (-AMF) root cross sections (A), and within the epidermis of representative control non-mycorrhizal (-AMF) root cross sections (B). Colour merge images show the relative location of U (red), P (blue) and Ca (yellow) with whiter regions exhibiting near-equivalent concentrations of all three chemicals.



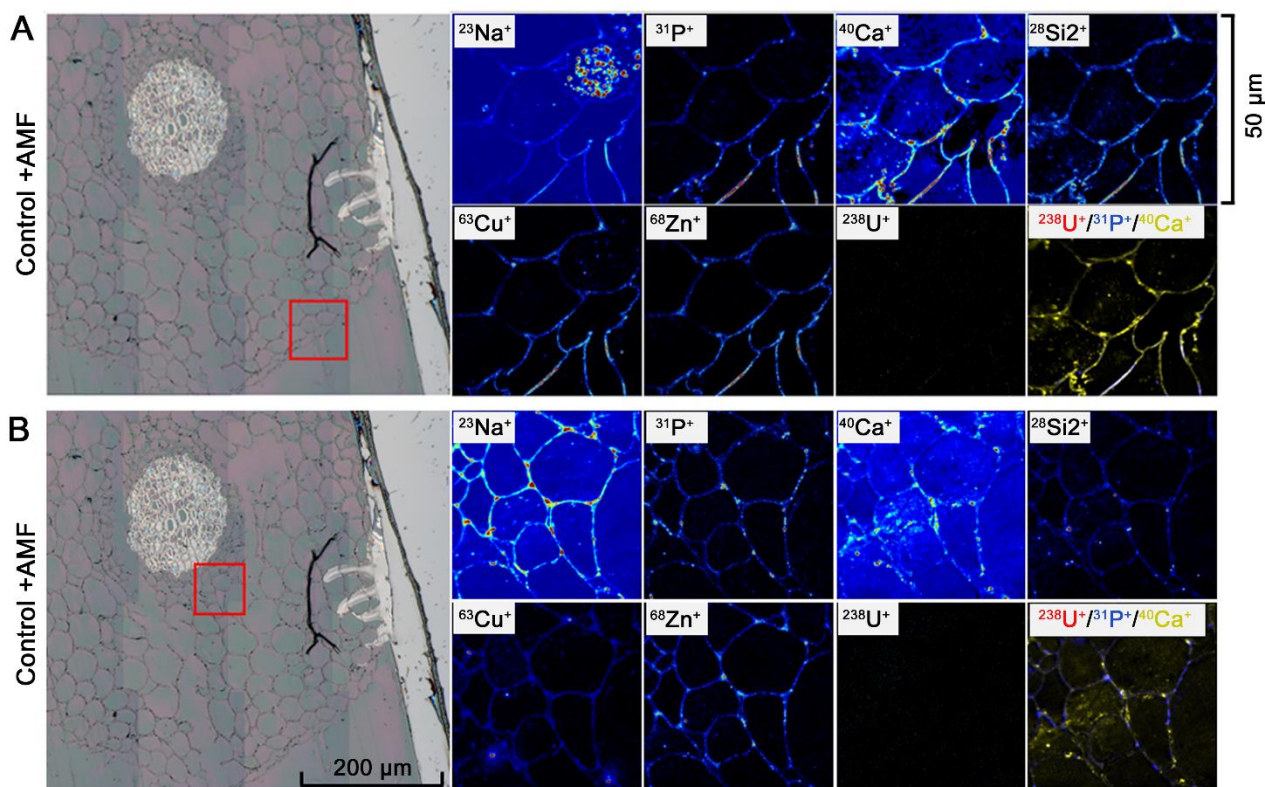

**Fig. S8.** NanoSIMS imaging of un-dosed (control) mycorrhizal roots. Optical photomicrographs of the root section (left) with NanoSIMS chemical maps (thermal colour scale) depicting elemental distributions of Na, P, Ca, Si<sub>2</sub>, Cu, Zn and U within the epidermis of representative control mycorrhizal (+AMF) root cross sections (A), and within the endodermis-cortex boundary of representative control mycorrhizal (+AMF) root cross sections (B). Colour merge images show the relative location of U (red), P (blue) and Ca (yellow) with whiter regions exhibiting near-equivalent concentrations of all three chemicals.



U-dosed +AMF

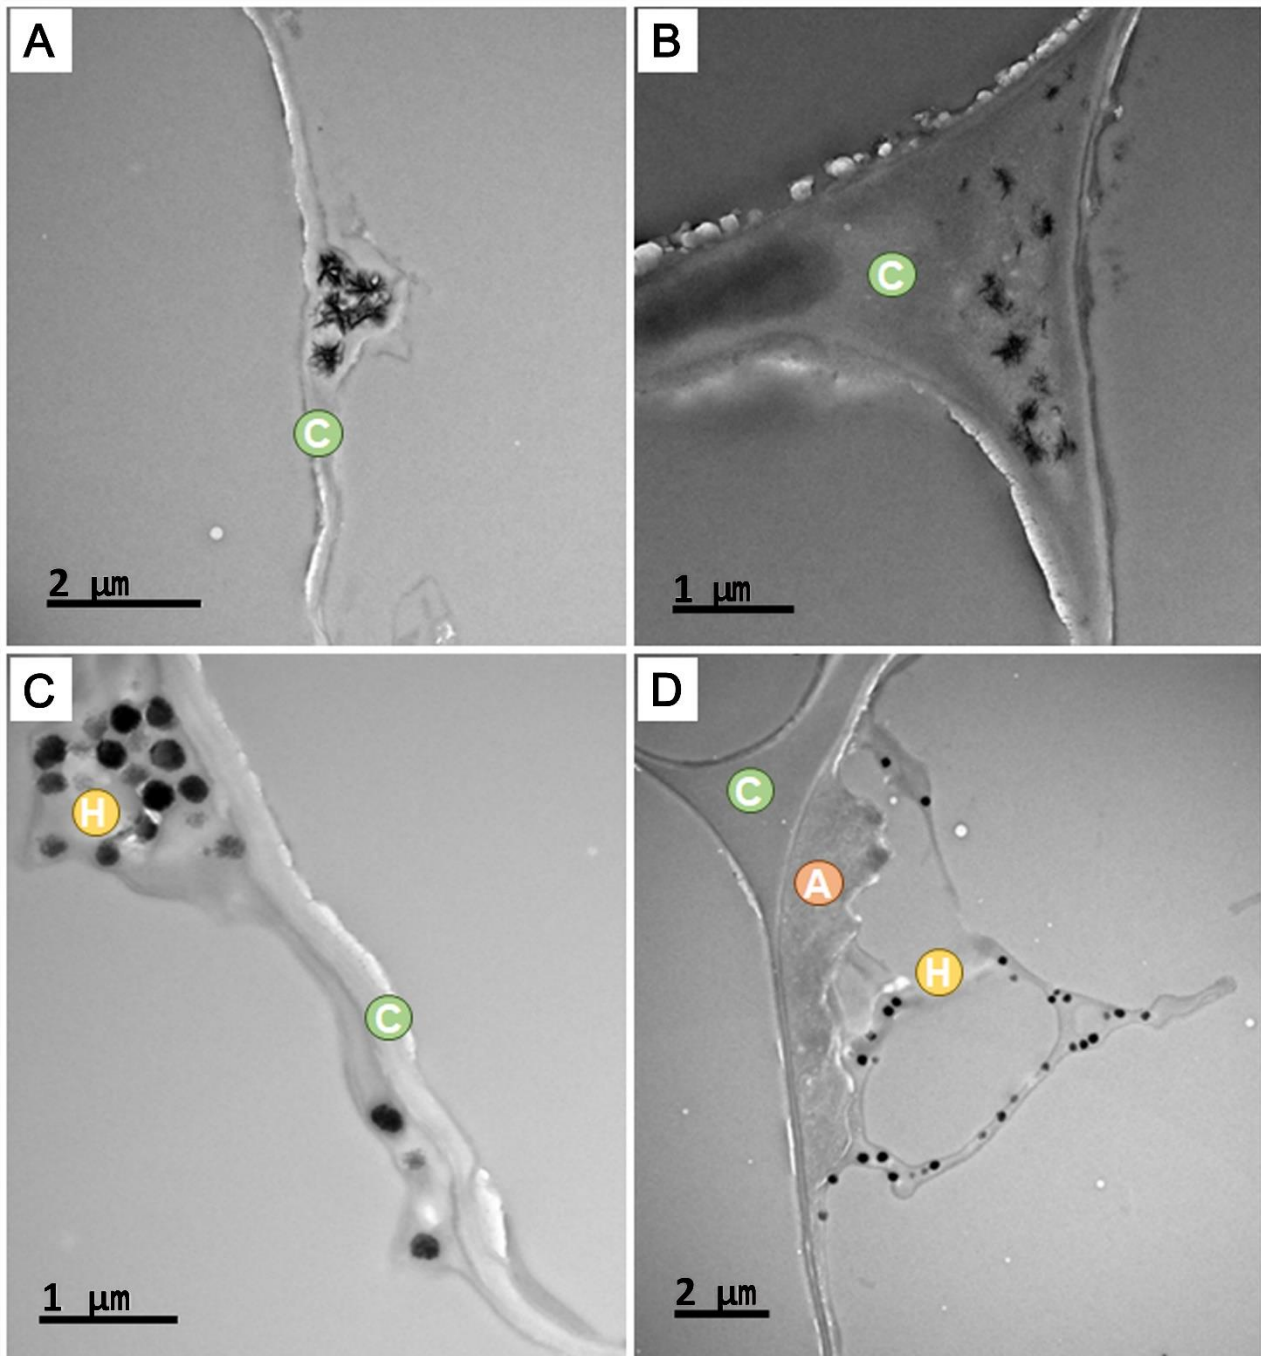

**Fig. S9.** TEM images of U-rich crystals in U-dosed mycorrhizal roots. (A and B) Acicular U-rich crystals present within the cell walls of representative mycorrhizal (+AMF), U-dosed root section. (C and D) U-rich rounded aggregates present within the fungal hyphal tissues of a representative mycorrhizal, U-dosed root section. Plant cell walls (indicated by 'C'), arbuscules (indicated by 'A') and hyphae (indicated by 'H') are annotated in each image.



## A U-dosed -AMF

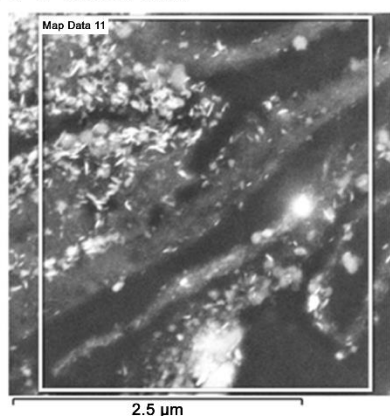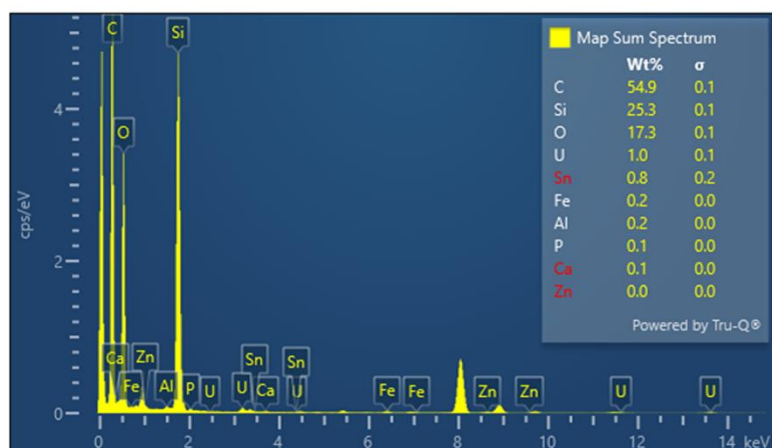

## B U-dosed +AMF

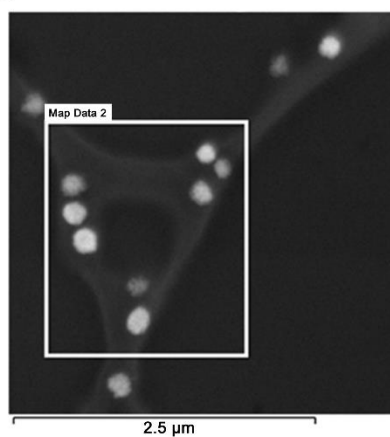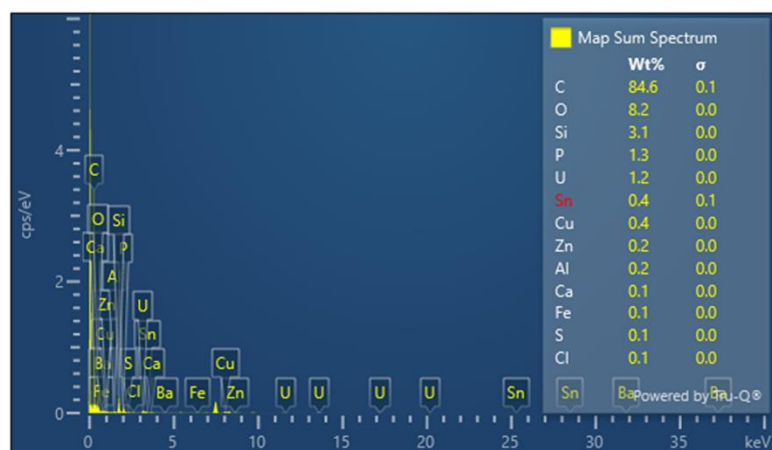

Cl K $\alpha$ 1

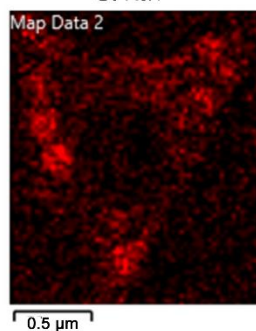

Cu K $\alpha$ 1

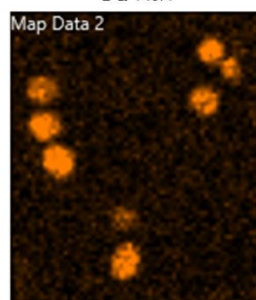

S K $\alpha$ 1

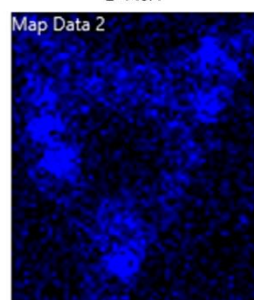

Sn K $\alpha$ 1

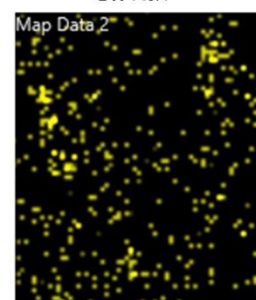

**Fig. S10.** BSE images of U-rich crystals in U-dosed roots. (A) U-rich acicular crystals present within the cell wall of a representative non-mycorrhizal (-AMF) root section of U-dosed seedlings. (B) U-rich rounded aggregates present within a representative mycorrhizal (+AMF) root section of U-dosed seedlings. STEM-EDS spectra giving percentage by weight (wt%) of each element within the mapped region is shown for each BSE image. Elemental maps generated by STEM-EDS for Cl, Cu, S and Sn of the mycorrhizal root section are also shown, with brighter colouration corresponding to a greater concentration of that element.



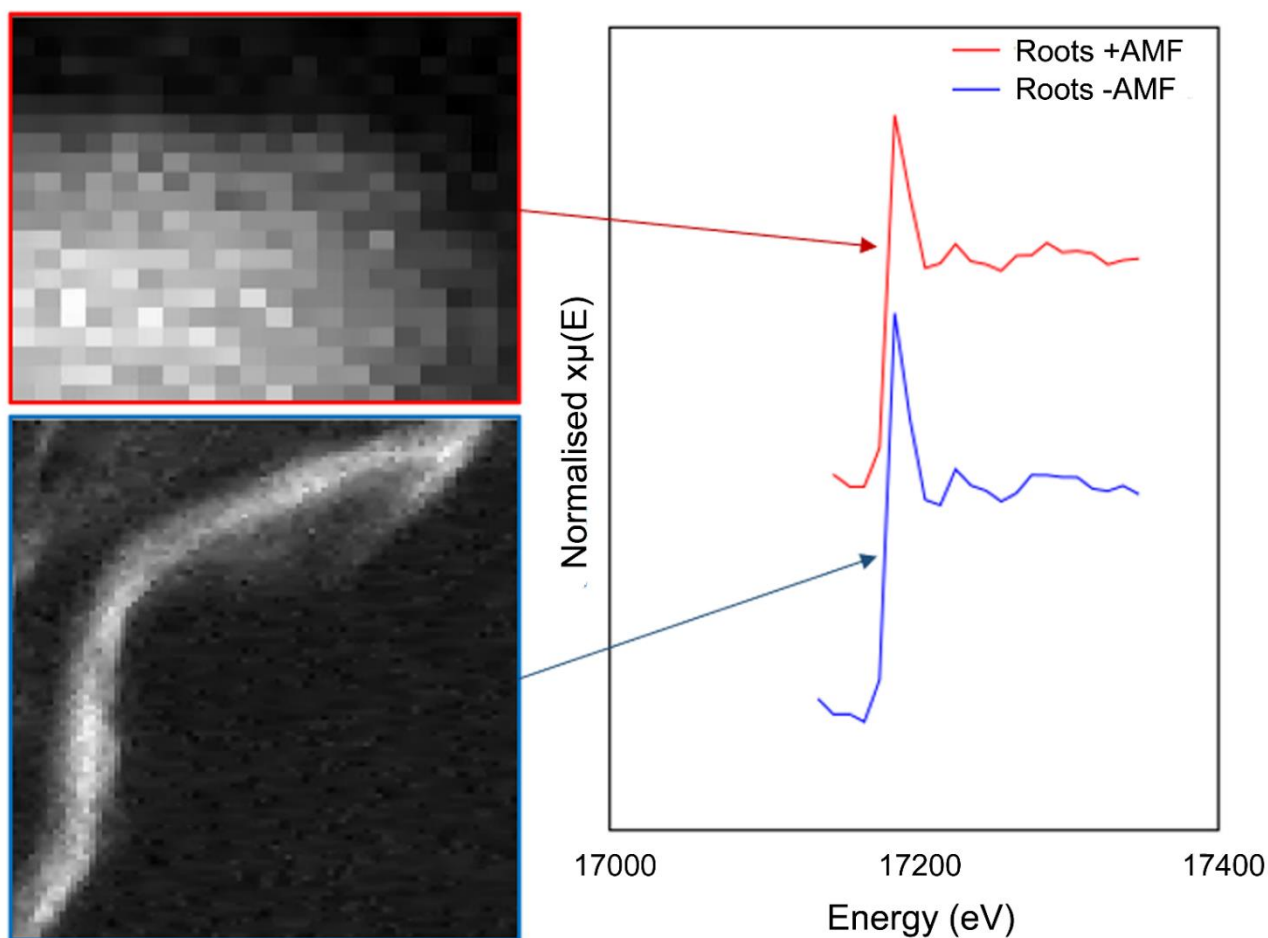

**Fig. S11.**  $\mu$ -XANES spectra at the  $L_3$  edge acquired for U-dosed non-mycorrhizal (-AMF) and mycorrhizal (+AMF) root samples. Spectra were collected in tandem with SR  $\mu$ -XRF via  $\mu$ -XANES mapping of selected U-rich particles (images shown in red and blue boxes) present within root epidermal cells over increasing energy (eV) levels.



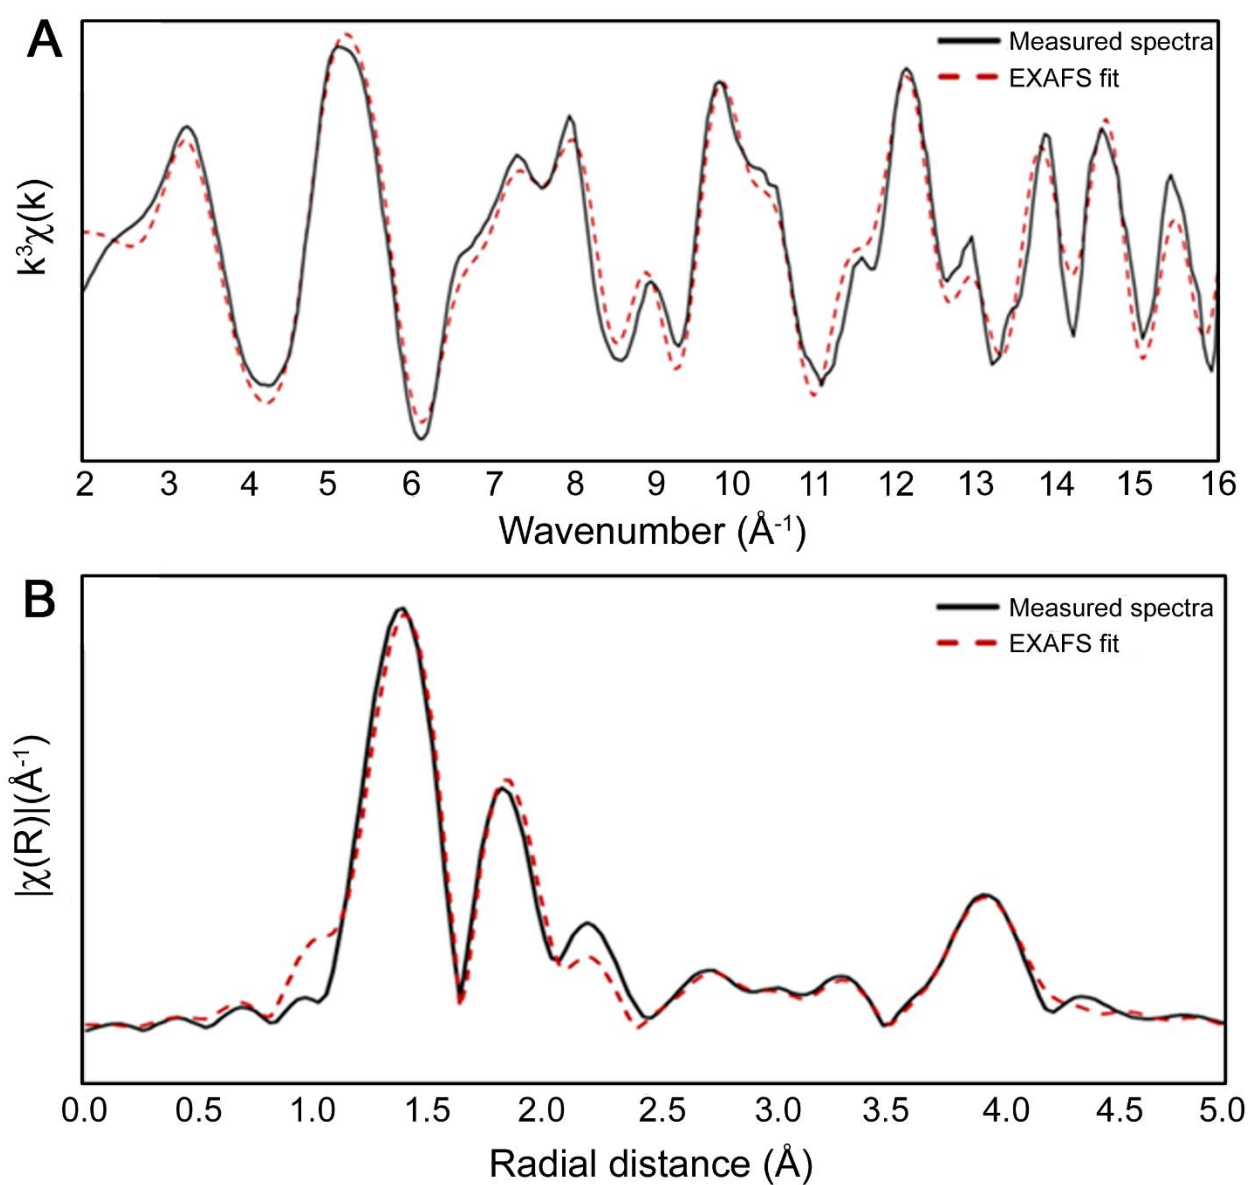

**Fig. S12.** U EXAFS k-space spectra (A) and Fourier Transform spectra (B) acquired from  $L_{3}$ -edge analysis of a standard compound of uranyl orthophosphate.



**Table S1.** Summary of EXAFS fit parameters for non-mycorrhizal (-AMF) and mycorrhizal (+AMF) shoots and roots, and U standards. R factor values < 0.02 indicate a high quality of fit between the model and measured spectra. Low Debye-Waller factor values ( $\sigma^2$ ) for the fitted shells (between 0.002 – 0.03 Å<sup>2</sup>) indicate that the location of atoms within the plant U structures align well with the theoretical position that they would possess in a pure, crystalline structure of the same compound.

| EXAFS Fitting Parameters <sup>†</sup>               |           |                    |       |                   |                                  |                 |          |
|-----------------------------------------------------|-----------|--------------------|-------|-------------------|----------------------------------|-----------------|----------|
| Sample Type                                         | Treatment | Shell              | N     | R (Å)             | σ <sup>2</sup> (Å <sup>2</sup> ) | ΔE <sub>0</sub> | R Factor |
| Shoots                                              | - AMF     | U-O <sub>ax</sub>  | 2     | 1.79 ± 0.04       | 0.00258                          | 6.58 ± 2.10     | 0.017    |
|                                                     |           | U-O <sub>eq1</sub> | 3     | 2.33 ± 0.03       | 0.00337                          | 10.99 ± 1.66    |          |
|                                                     |           | U-O <sub>eq2</sub> | 2     | 2.48 ± 0.01       | 0.00337                          |                 |          |
|                                                     |           | U-P <sub>1</sub>   | 1     | 3.17 ± 0.01       | 0.00626                          |                 |          |
|                                                     |           | U-P <sub>2</sub>   | 1     | 3.58 ± 0.02       | 0.00626                          |                 |          |
|                                                     |           | U-P <sub>3</sub>   | 2     | 3.74 ± 0.01       | 0.00626                          |                 |          |
|                                                     |           | U-U                | 1.5   | 3.99 ± 0.03       | 0.01173                          |                 |          |
|                                                     | + AMF     | U-O <sub>ax</sub>  | 2     | 1.80 ± 0.04       | 0.00235                          | 6.46 ± 1.66     | 0.009    |
|                                                     |           | U-O <sub>eq1</sub> | 3     | 2.33 ± 0.04       | 0.00269                          | 10.95 ± 1.32    |          |
|                                                     |           | U-O <sub>eq2</sub> | 2     | 2.49 ± 0.00       | 0.00269                          |                 |          |
|                                                     |           | U-P <sub>1</sub>   | 1     | 3.18 ± 0.02       | 0.00632                          |                 |          |
|                                                     |           | U-P <sub>2</sub>   | 1     | 3.59 ± 0.01       | 0.00632                          |                 |          |
|                                                     |           | U-P <sub>3</sub>   | 2     | 3.75 ± 0.01       | 0.00632                          |                 |          |
|                                                     |           | U-U                | 1     | 4.01 ± 0.01       | 0.00914                          |                 |          |
| Roots                                               | - AMF     | U-O <sub>ax</sub>  | 2     | 1.76 ± 0.05       | 0.00301                          | 14.07 ± 1.60    | 0.006    |
|                                                     |           | U-O <sub>eq1</sub> | 2     | 2.30 ± 0.01       | 0.00313                          | 8.67 ± 1.24     |          |
|                                                     |           | U-O <sub>eq2</sub> | 3     | 2.45 ± 0.04       | 0.00263                          |                 |          |
|                                                     |           | U-P <sub>1</sub>   | 1     | 3.15 ± 0.01       | 0.00928                          |                 |          |
|                                                     |           | U-P <sub>2</sub>   | 2     | 3.64 ± 0.11       | 0.00837                          |                 |          |
|                                                     |           | U-U                | 1.5   | 3.94 ± 0.08       | 0.01275                          |                 |          |
|                                                     |           |                    | + AMF | U-O <sub>ax</sub> | 2                                | 1.76 ± 0.06     |          |
| U-O <sub>eq1</sub>                                  | 2         |                    |       | 2.30 ± 0.02       | 0.00590                          | 11.64 ± 1.33    |          |
| U-O <sub>eq2</sub>                                  | 3         |                    |       | 2.49 ± 0.04       | 0.00687                          |                 |          |
| U-P <sub>1</sub>                                    | 1         |                    |       | 3.17 ± 0.02       | 0.01215                          |                 |          |
| U-P <sub>2</sub>                                    | 1         |                    |       | 3.61 ± 0.01       | 0.01215                          |                 |          |
| U-P <sub>3</sub>                                    | 2         |                    |       | 3.71 ± 0.04       | 0.01215                          |                 |          |
| U-U                                                 | 2         |                    |       | 3.93 ± 0.08       | 0.01355                          |                 |          |
| Uranyl Orthophosphate<br>Standard                   |           | U-O <sub>ax</sub>  | 2     | 1.77 ± 0.01       | 0.00165                          | 8.94 ± 1.40     | 0.009    |
|                                                     |           | U-O <sub>eq1</sub> | 3     | 2.35 ± 0.05       | 0.00323                          | 10.14 ± 1.05    |          |
|                                                     |           | U-O <sub>eq2</sub> | 2     | 2.49 ± 0.00       | 0.00323                          |                 |          |
|                                                     |           | U-P <sub>1</sub>   | 1     | 3.18 ± 0.02       | 0.00286                          |                 |          |
|                                                     |           | U-P <sub>2</sub>   | 1     | 3.59 ± 0.01       | 0.00371                          |                 |          |
|                                                     |           | U-P <sub>3</sub>   | 2     | 3.81 ± 0.05       | 0.00623                          |                 |          |
|                                                     |           | U-U                | 2     | 4.02 ± 0.00       | 0.00797                          |                 |          |
| Uranyl Orthophosphate<br>(Catalano and Brown, 2004) |           | U-O <sub>ax</sub>  | 2     | 1.77 ± 0.03       | 0.0032                           | 8 ± 1           | N/A      |
|                                                     |           | U-O <sub>eq1</sub> | 2.67  | 2.31 ± 0.09       | 0.0042                           | 7 ± 2           |          |
|                                                     |           | U-O <sub>eq2</sub> | 2.33  | 2.47 ± 0.01       | 0.0051                           | 7 ± N/A         |          |
|                                                     |           | U-P <sub>1</sub>   | 0.67  | 3.16 ± 0.07       | 0.0070                           | 7 ± N/A         |          |
|                                                     |           | U-P <sub>2</sub>   | 0.67  | 3.56 ± 0.05       | 0.0050                           | 7 ± N/A         |          |
|                                                     |           | U-P <sub>3</sub>   | 2     | 3.80 ± 0.09       | 0.0090                           | 7 ± N/A         |          |
|                                                     |           | U-U                | 1.33  | 4.03 ± 0.06       | 0.0061                           | 4 ± 2           |          |
| Meta-torbernite<br>(Catalano and Brown, 2004)       |           | U-O <sub>ax</sub>  | 2     | 1.77 ± 0.06       | 0.0042                           | 8 ± 1           | N/A      |
|                                                     |           | U-O <sub>eq</sub>  | 4     | 2.28 ± 0.06       | 0.0037                           | 8 ± N/A         |          |
|                                                     |           | U-P                | 4     | 3.59 ± 0.02       | 0.0040                           | 8 ± N/A         |          |
|                                                     |           | U-U                | 4     | 5.23 ± 0.05       | 0.0120                           | 4 ± 4           |          |
| Meta-autunite<br>(Catalano and Brown, 2004)         |           | U-O <sub>ax</sub>  | 2     | 1.78 ± 0.04       | 0.0035                           | 4 ± 2           | N/A      |
|                                                     |           | U-O <sub>eq</sub>  | 4     | 2.28 ± 0.04       | 0.0036                           | 3 ± 1           |          |
|                                                     |           | U-P                | 4     | 3.59 ± 0.01       | 0.0050                           | 4 ± N/A         |          |
|                                                     |           | U-U                | 4     | 5.22 ± 0.06       | 0.0140                           | 1 ± 7           |          |

<sup>†</sup>EXAFS fitting parameters include the co-ordination number (N), the radial distance of the bonds (Å), energy shift ( $\Delta E_0$ ) and  $\sigma^2$  represents the Debye-Waller factor, a measure of the displacement of atoms from their ideal, crystal lattice positions. N/A represents a value that is unknown based on the work of the referenced study.



**Table S2.** Total concentration (mg kg<sup>-1</sup>) of P, K, Ca, S, Cu and Zn in root and shoot tissues from control (un-dosed) and U-dosed non-mycorrhizal (-AMF) and mycorrhizal (+AMF) *P. lanceolata* seedlings. Data are mean values  $\pm$  SEM, n = 5. Different lowercase letters indicate statistically significant differences for that element between treatments ( $p < 0.05$ ) as determined by 2-way ANOVA and Tukey's post-hoc test.

| Sample Type | Dosing Treatment | AMF Treatment | Element | Mean Concentration (mg kg <sup>-1</sup> ) ( $\pm$ SEM) |
|-------------|------------------|---------------|---------|--------------------------------------------------------|
| Shoots      | Un-dosed         | - AMF         | P       | 4744.40 ( $\pm$ 321.42) <sup>a</sup>                   |
|             |                  |               | K       | 32990.80 ( $\pm$ 812.49) <sup>a</sup>                  |
|             |                  |               | Ca      | 34065.80 ( $\pm$ 2028.26) <sup>a</sup>                 |
|             |                  |               | S       | 5541.20 ( $\pm$ 406.48) <sup>a</sup>                   |
|             |                  |               | Cu      | 16.25 ( $\pm$ 1.66) <sup>a</sup>                       |
|             |                  |               | Zn      | 19.62 ( $\pm$ 2.48) <sup>a</sup>                       |
|             |                  | + AMF         | P       | 4495.80 ( $\pm$ 370.05) <sup>a</sup>                   |
|             |                  |               | K       | 28483.80 ( $\pm$ 2148.15) <sup>a</sup>                 |
|             |                  |               | Ca      | 27791.60 ( $\pm$ 3333.03) <sup>a</sup>                 |
|             |                  |               | S       | 6401.20 ( $\pm$ 770.69) <sup>a</sup>                   |
|             |                  |               | Cu      | 15.20 ( $\pm$ 1.29) <sup>a</sup>                       |
|             |                  |               | Zn      | 29.00 ( $\pm$ 5.21) <sup>a</sup>                       |
| Roots       | Un-dosed         | - AMF         | P       | 2104.90 ( $\pm$ 258.10) <sup>b</sup>                   |
|             |                  |               | K       | 29617.20 ( $\pm$ 2226.36) <sup>a</sup>                 |
|             |                  |               | Ca      | 6531.40 ( $\pm$ 482.37) <sup>b</sup>                   |
|             |                  |               | S       | 2553.80 ( $\pm$ 167.64) <sup>b</sup>                   |
|             |                  |               | Cu      | 76.64 ( $\pm$ 18.52) <sup>b</sup>                      |
|             |                  |               | Zn      | 18.16 ( $\pm$ 1.53) <sup>a</sup>                       |
|             |                  | + AMF         | P       | 4343.16 ( $\pm$ 1149.97) <sup>a b</sup>                |
|             |                  |               | K       | 33670.40 ( $\pm$ 5660.20) <sup>a</sup>                 |
|             |                  |               | Ca      | 7114.40 ( $\pm$ 931.98) <sup>b</sup>                   |
|             |                  |               | S       | 4211.60 ( $\pm$ 862.78) <sup>a b c</sup>               |
|             |                  |               | Cu      | 77.12 ( $\pm$ 27.38) <sup>b</sup>                      |
|             |                  |               | Zn      | 33.22 ( $\pm$ 8.84) <sup>a</sup>                       |
| Shoots      | U-dosed          | - AMF         | P       | 5037.16 ( $\pm$ 370.27) <sup>a</sup>                   |
|             |                  |               | K       | 29794.40 ( $\pm$ 1504.77) <sup>a</sup>                 |
|             |                  |               | Ca      | 23288.80 ( $\pm$ 2166.26) <sup>a</sup>                 |
|             |                  |               | S       | 4037.00 ( $\pm$ 198.93) <sup>c</sup>                   |
|             |                  |               | Cu      | 12.12 ( $\pm$ 0.74) <sup>a</sup>                       |
|             |                  |               | Zn      | 25.88 ( $\pm$ 3.29) <sup>a</sup>                       |
|             |                  | + AMF         | P       | 5859.60 ( $\pm$ 300.59) <sup>a</sup>                   |
|             |                  |               | K       | 31676.75 ( $\pm$ 3974.58) <sup>a</sup>                 |
|             |                  |               | Ca      | 23915.25 ( $\pm$ 2815.04) <sup>a</sup>                 |
|             |                  |               | S       | 3640.50 ( $\pm$ 336.04) <sup>b c</sup>                 |
|             |                  |               | Cu      | 12.03 ( $\pm$ 0.88) <sup>a</sup>                       |
|             |                  |               | Zn      | 24.18 ( $\pm$ 2.78) <sup>a</sup>                       |
| Roots       | U-dosed          | - AMF         | P       | 3958.22 ( $\pm$ 1057.54) <sup>a b</sup>                |
|             |                  |               | K       | 17053.60 ( $\pm$ 1696.43) <sup>b</sup>                 |
|             |                  |               | Ca      | 12202.60 ( $\pm$ 3117.93) <sup>b</sup>                 |
|             |                  |               | S       | 2230.60 ( $\pm$ 452.52) <sup>b</sup>                   |
|             |                  |               | Cu      | 21.52 ( $\pm$ 5.44) <sup>a b c</sup>                   |
|             |                  |               | Zn      | 31.36 ( $\pm$ 12.06) <sup>a</sup>                      |
|             |                  | + AMF         | P       | 3779.60 ( $\pm$ 1051.76) <sup>a b</sup>                |
|             |                  |               | K       | 22856.75 ( $\pm$ 2247.98) <sup>a b</sup>               |
|             |                  |               | Ca      | 9023.00 ( $\pm$ 1007.79) <sup>b</sup>                  |
|             |                  |               | S       | 1703.25 ( $\pm$ 272.30) <sup>b</sup>                   |
|             |                  |               | Cu      | 17.73 ( $\pm$ 1.12) <sup>c</sup>                       |
|             |                  |               | Zn      | 18.78 ( $\pm$ 2.13) <sup>a</sup>                       |
